# Supplementary material for: Synthesis and Photophysics Characterization of Boronic Styril and Distyryl BODIPYs for Water-Based Dye-Sensitized Solar Cells
Source: MDPI journal article supplement (doi:10.3390/biomimetics7030110), 2022-08-11
Supplement: s1 [file s1]

## Table of Contents

|                                                                                           |         |
|-------------------------------------------------------------------------------------------|---------|
| 1. DSSC with dye 1 and dye 2.....                                                         | S1      |
| 2. NMR spectra ( $^1\text{H}$ , $^{13}\text{C}$ , $^{11}\text{B}$ ) and mass spectra..... | S2-S10  |
| 3. Additional data.....                                                                   | S11-S13 |

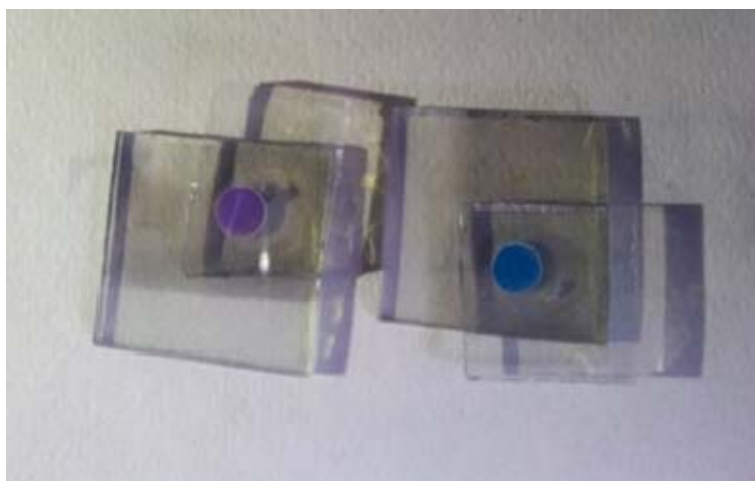

**Figure S1.** DSSC device with *BODIPY 1* and DSSC device with *BODIPY 2*.

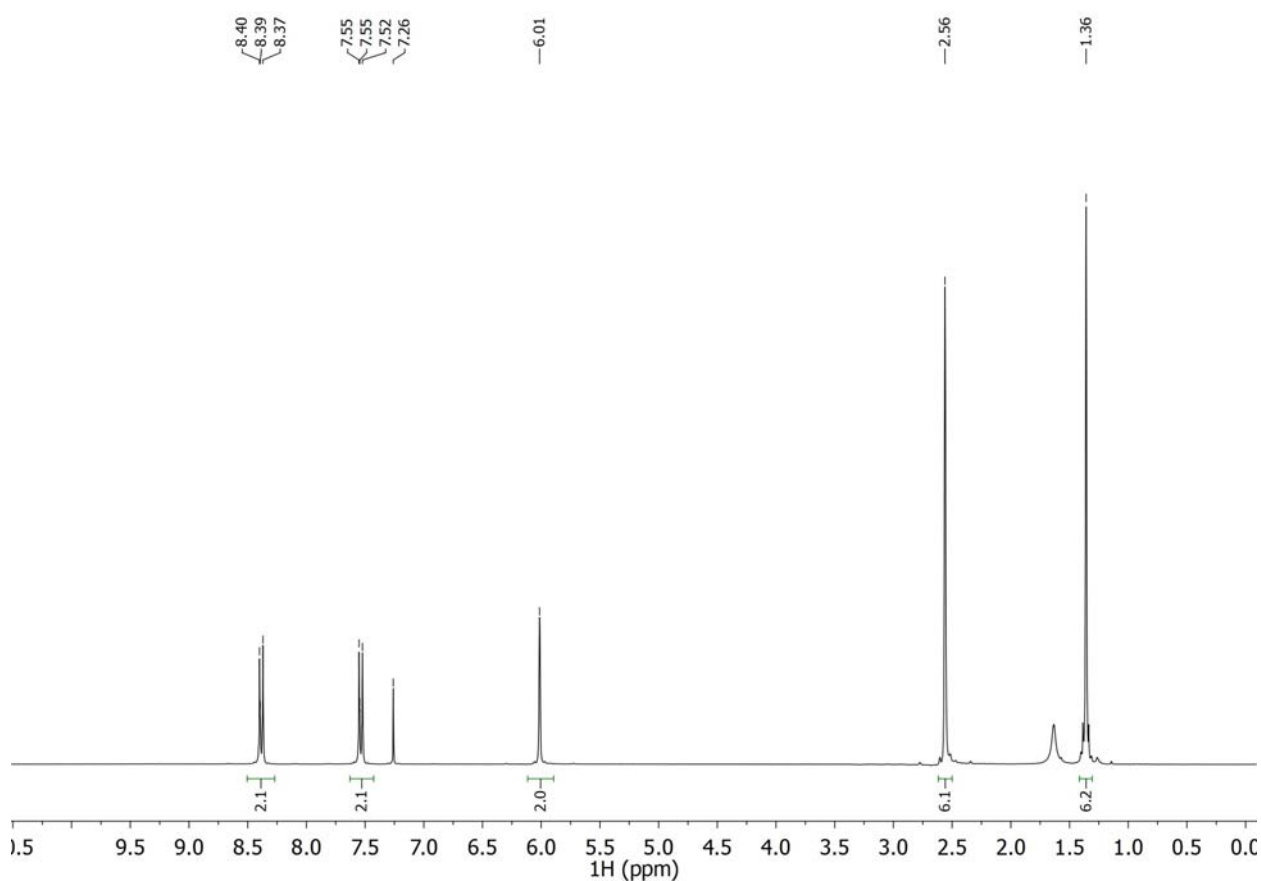

**Figure S2.**  $^1\text{H}$ -NMR (500 MHz,  $\text{CDCl}_3$ ) of 8-(*p*-nitrophenyl)-3,5,7,9-tetramethyl-BODIPY.

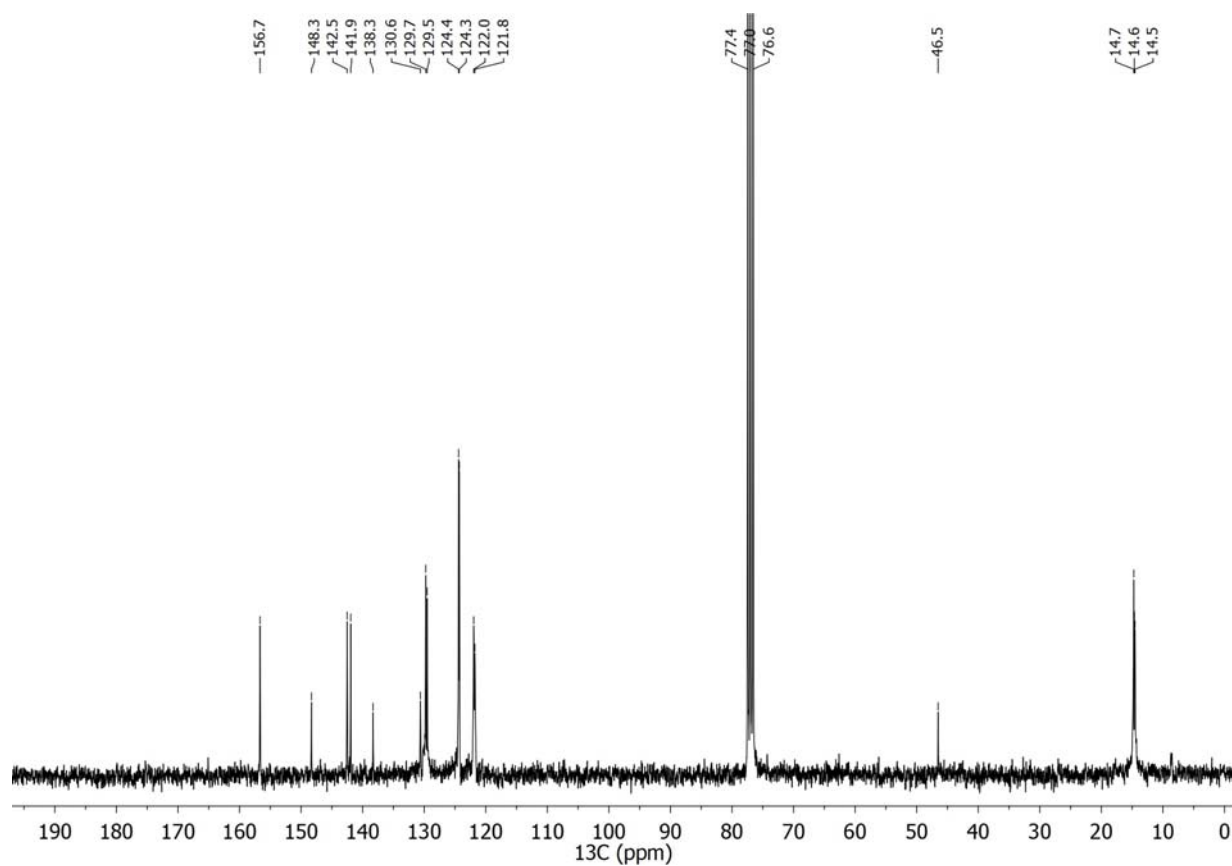

**Figure S3.**  $^{13}\text{C}$ -NMR (125 MHz,  $\text{CDCl}_3$ ) of 8-(*p*-nitrophenyl)-3,5,7,9-tetramethyl-BODIPY.

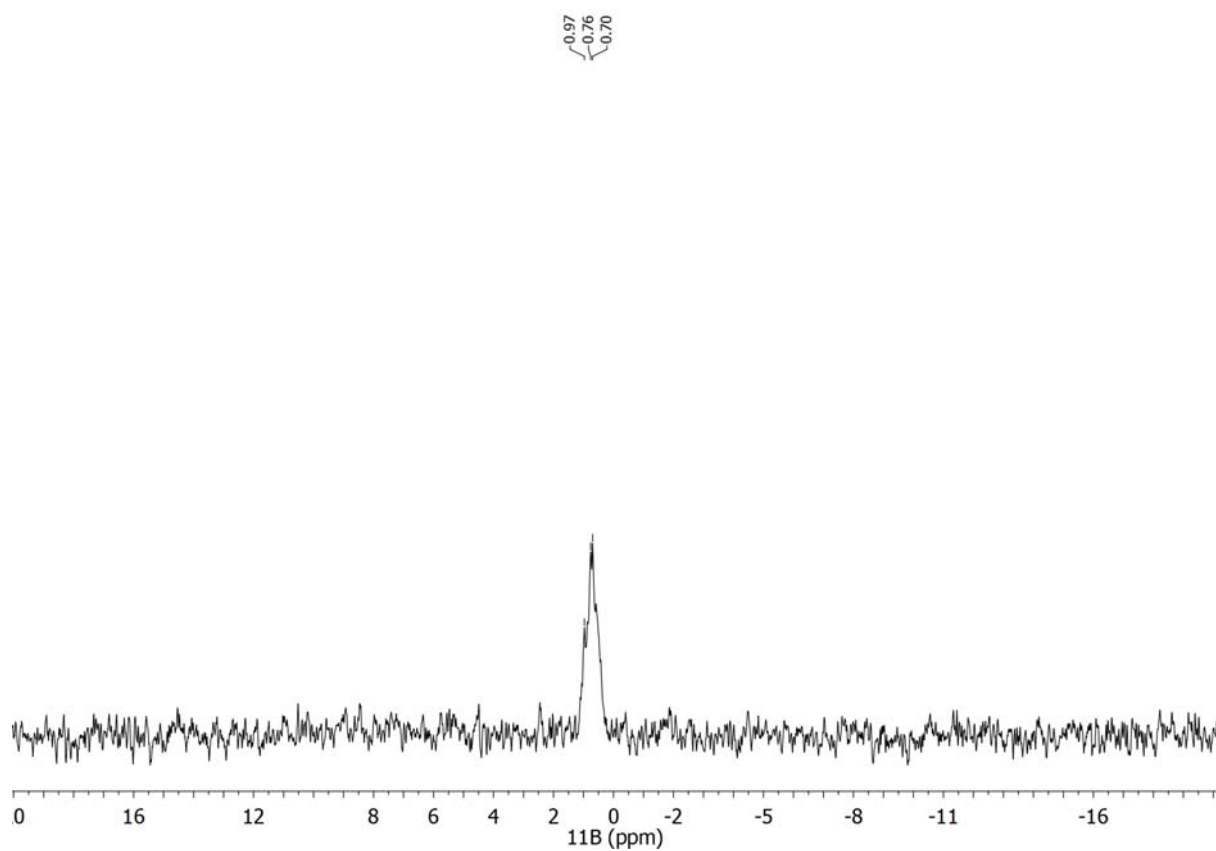

**Figure S4.**  $^{11}\text{B}$ -NMR (128 MHz,  $\text{CDCl}_3$ ) of 8-(*p*-nitrophenyl)-3,5,7,9-tetramethyl-BODIPY.

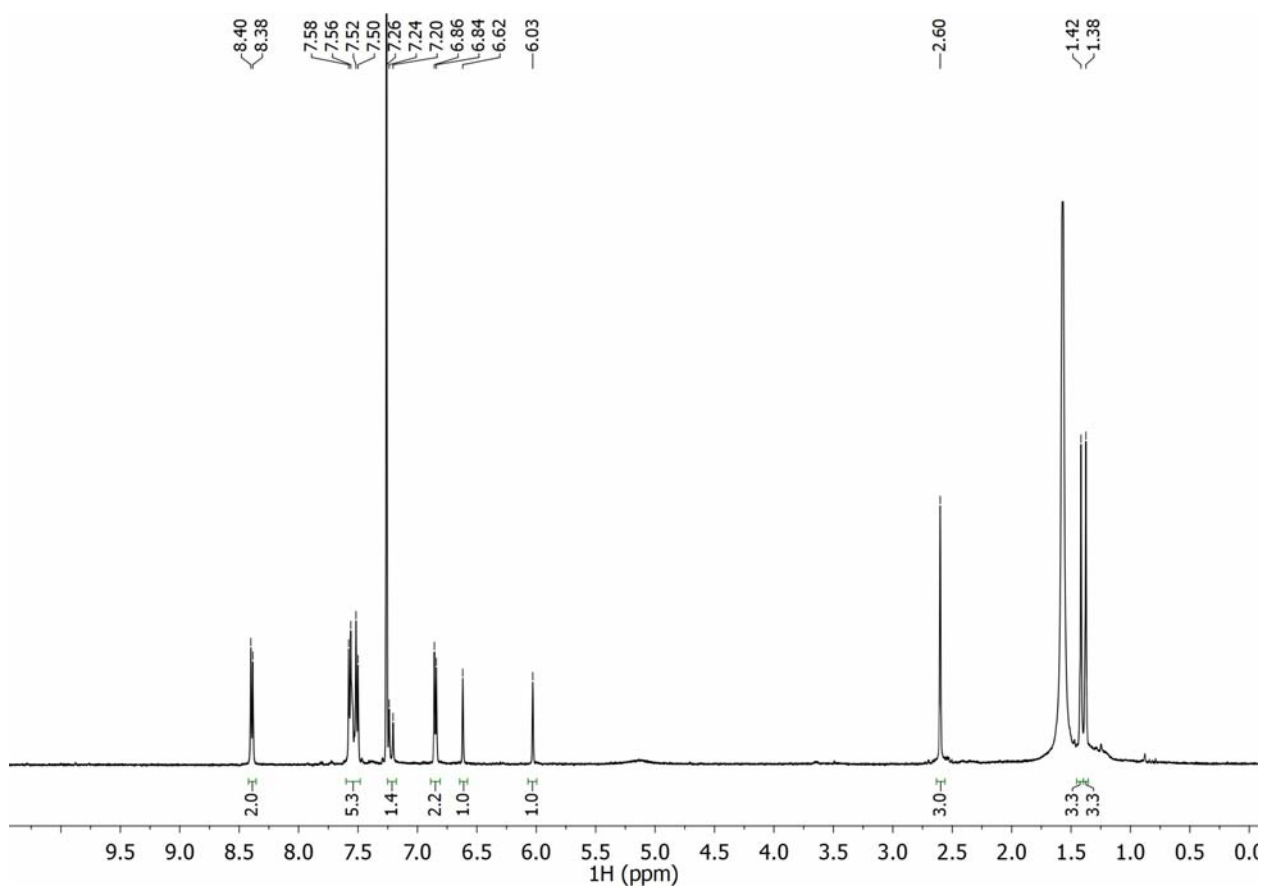

Figure S5. <sup>1</sup>H-NMR (500 MHz, CDCl<sub>3</sub>) of styryl boronic acid BODIPY **1**.

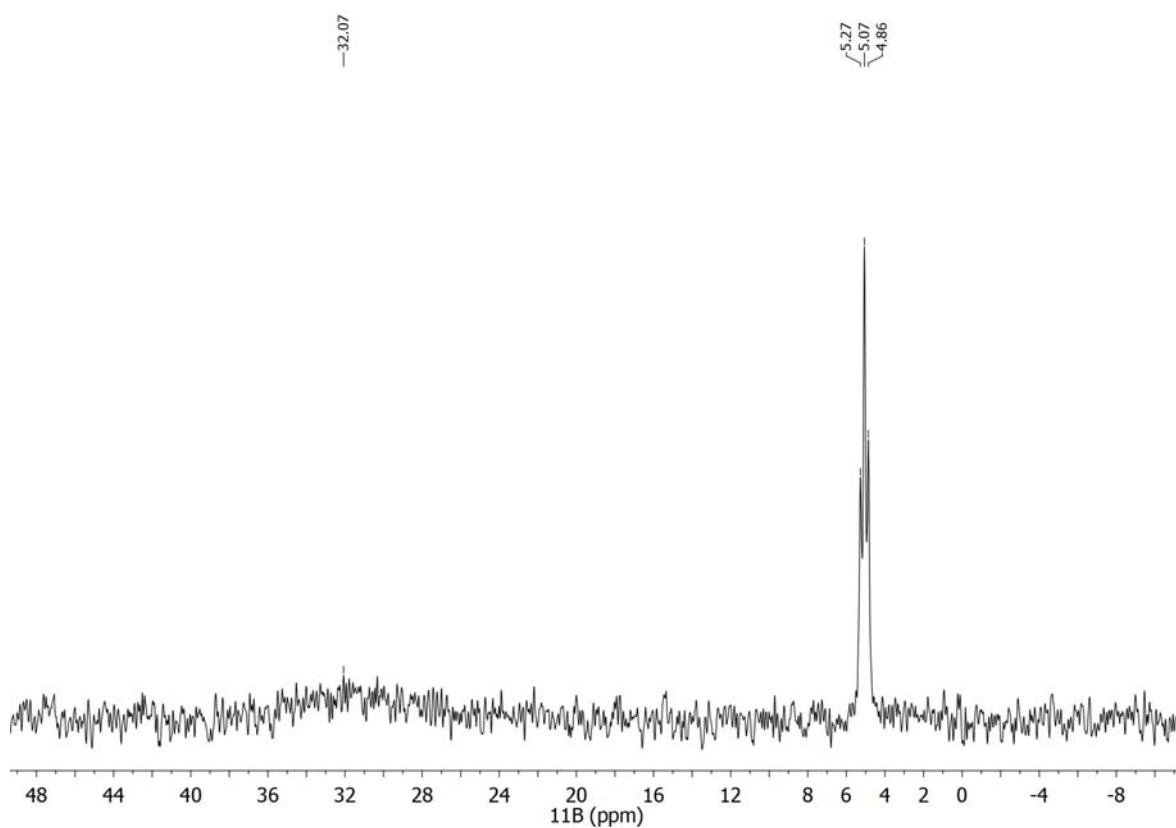

Figure S6. <sup>11</sup>B-NMR (128 MHz, CDCl<sub>3</sub>) of styryl boronic acid BODIPY **1**.

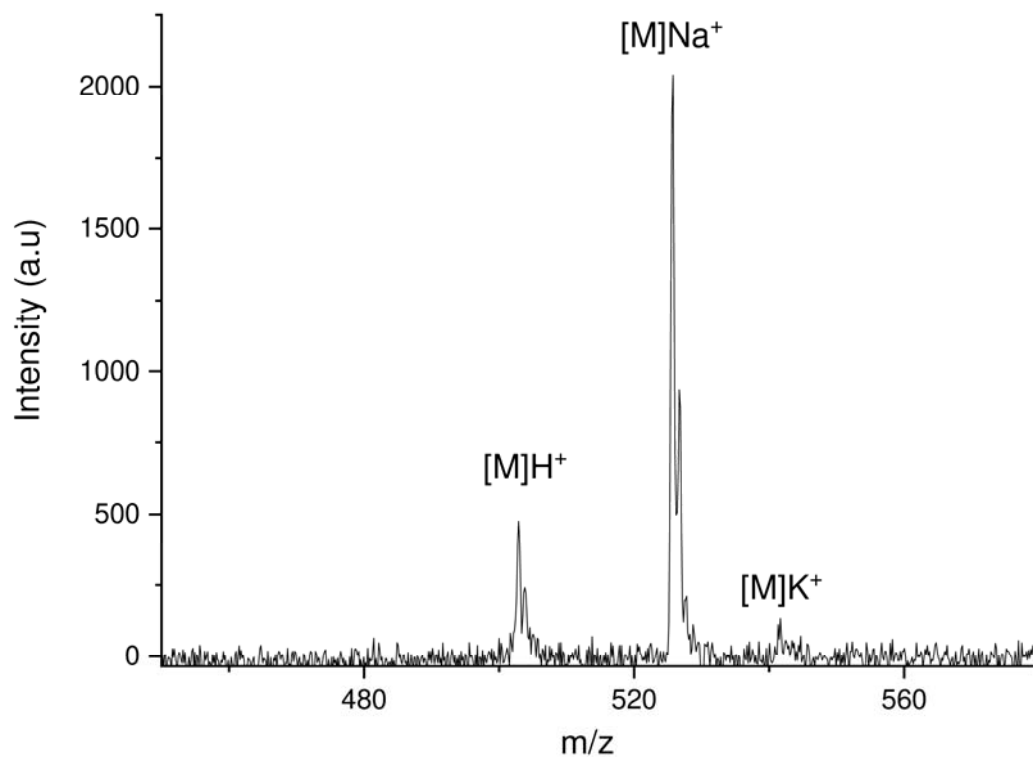

**Figure S7.** Mass of styryl boronic acid BODIPY 1.

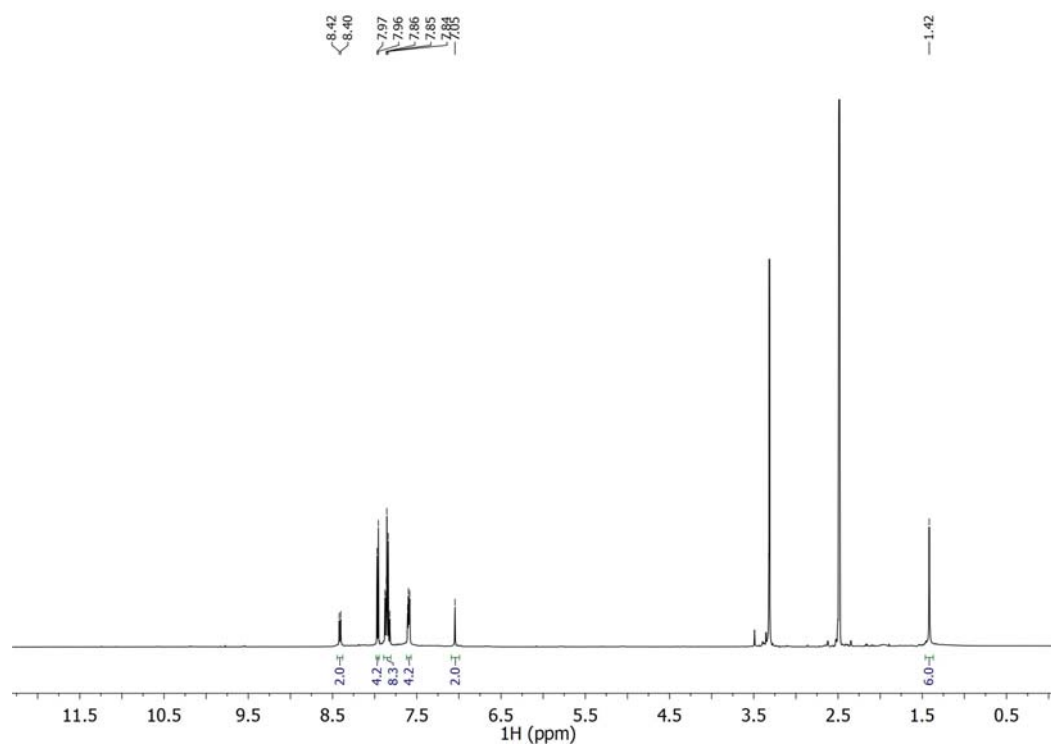

**Figure S8.**  $^1H$ -NMR (500 MHz, DMSO- $d_6$ ) of distyryl boronic acid BODIPY 2.

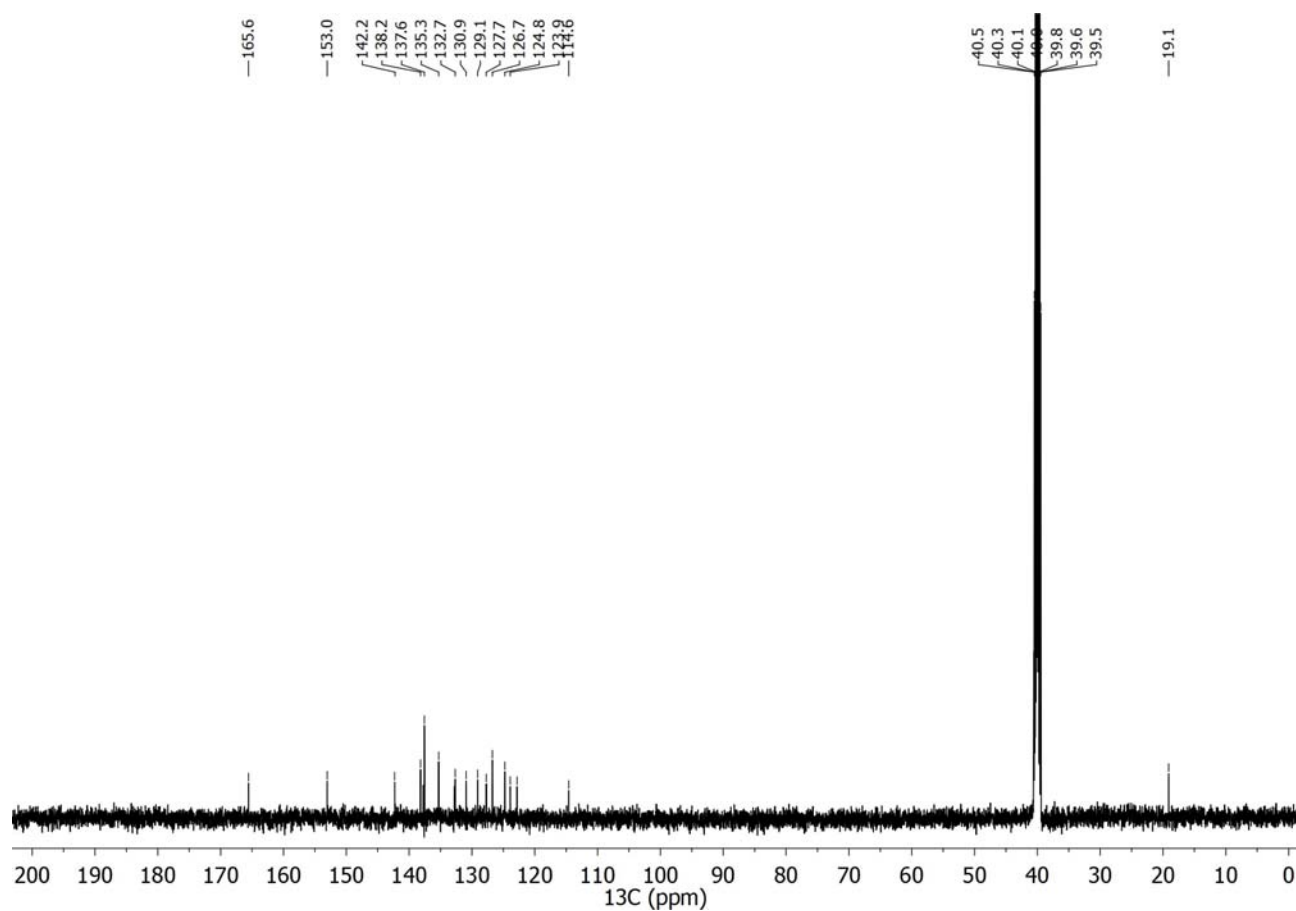

Figure S9.  $^{13}\text{C}$ -NMR (125 MHz,  $\text{DSMO-d}_6$ ) of distyryl boronic acid BODIPY 2.

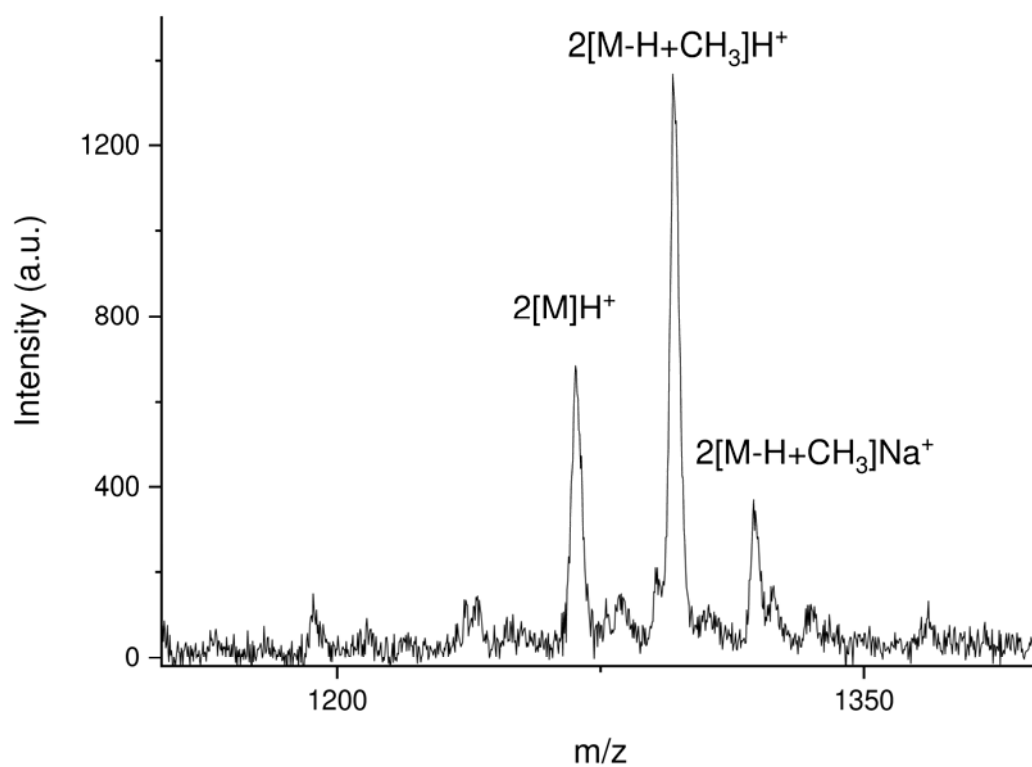

Figure S10. Mass of distyryl boronic acid BODIPY 2.

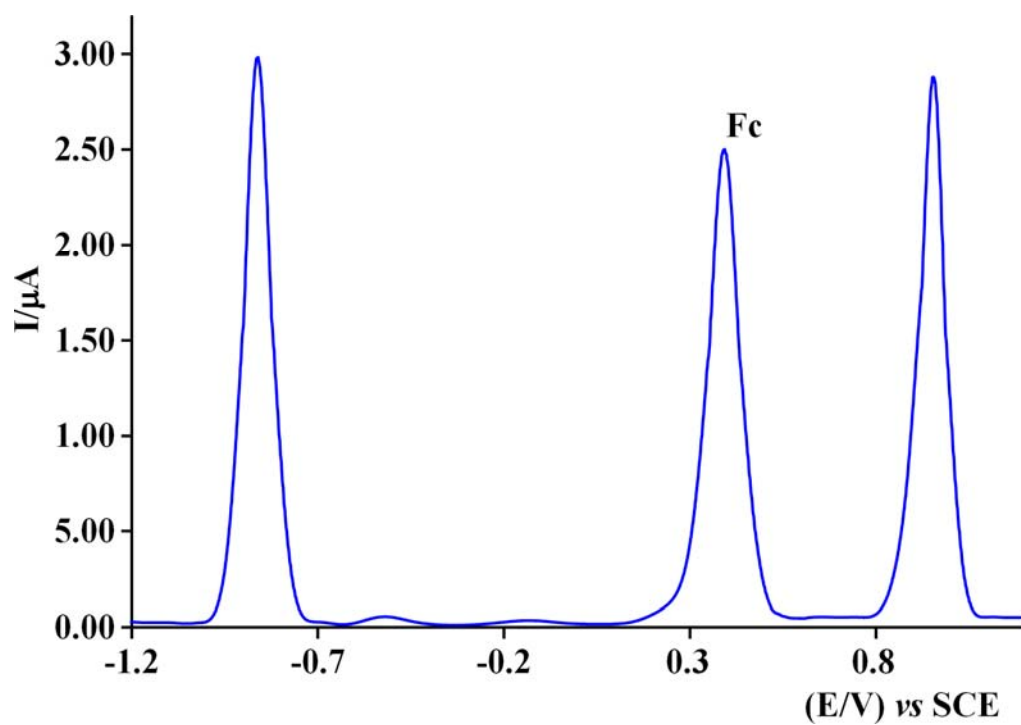

**Figure S11.** Differential pulse voltammograms of BODIPY 1 in acetonitrile (scan rate 20mV/s) (Fc= Ferrocene).

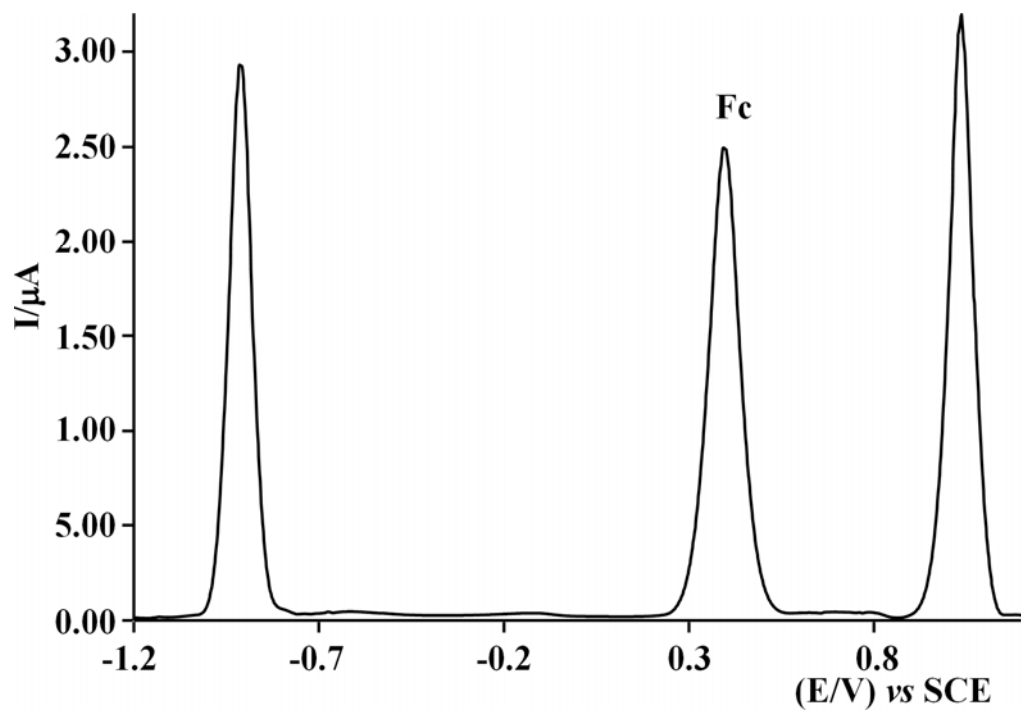

**Figure S12.** Differential pulse voltammograms of 1BODIPY 2 in acetonitrile (scan rate 20mV/s) (Fc= Ferrocene).

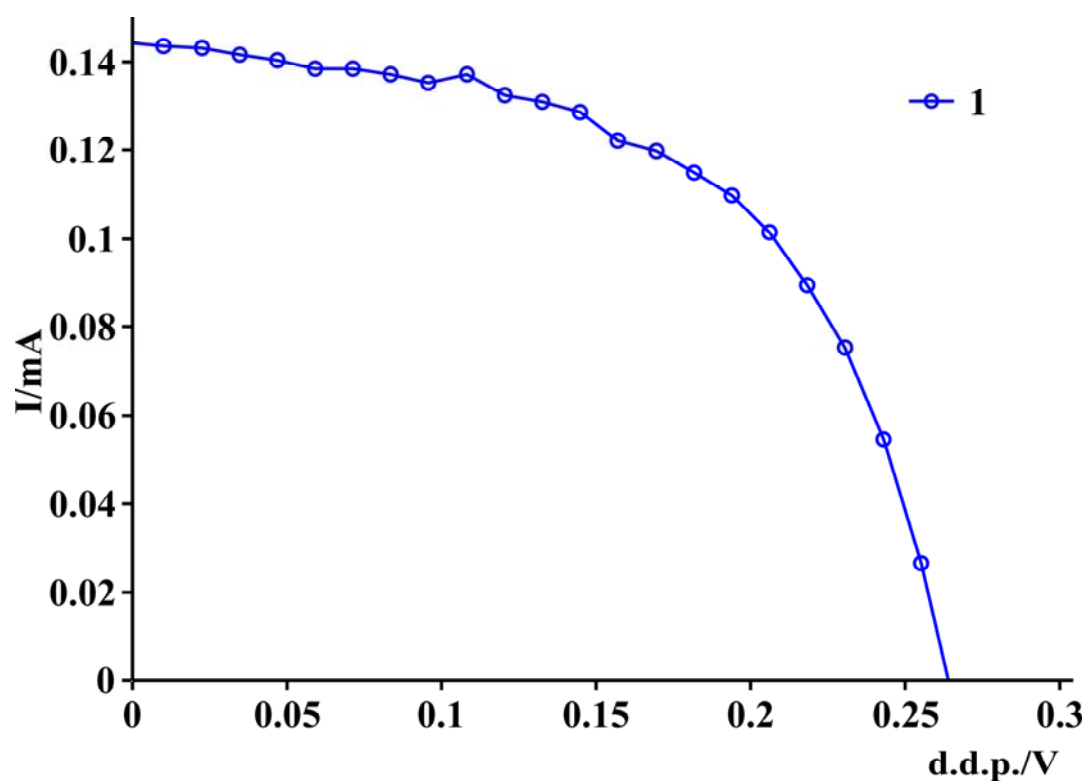

Figure S13. I-V curve of BODIPY 1.

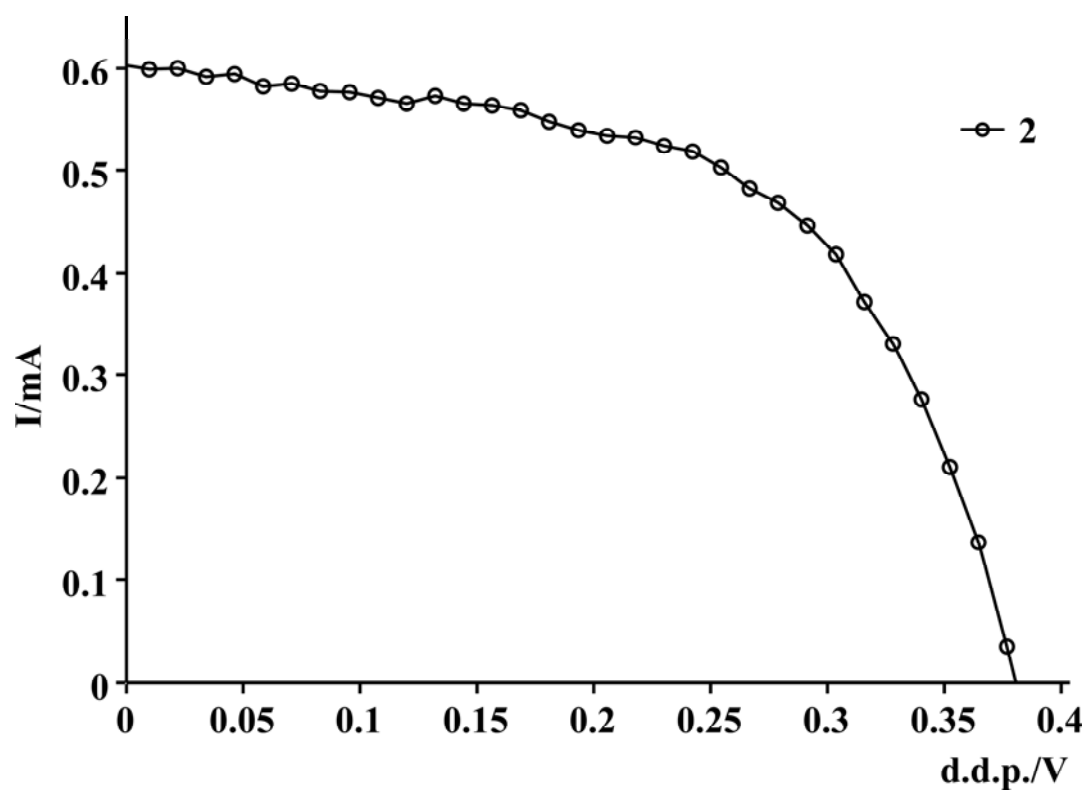

Figure S14. I-V curve of BODIPY 2.



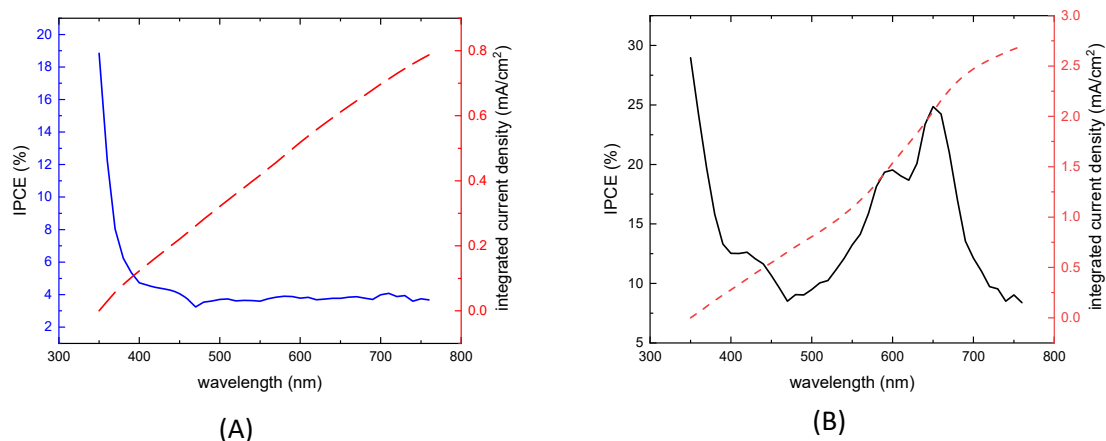

**Figure S15.** Incident photon-to-current conversion efficiency (IPCE) and Integrated current density for the best realized device of A) BODIPY 1 and B) BODIPY 2

**Table S1.** Photovoltaic performances of realized devices for BODIPY 1 and BPDIPY 2. In acetonitrile and  $I^-/I^{3-}$  as mediator.

|          | PCE (%) | Jsc<br>(mA/cm <sup>2</sup> ) | Voc (V) | FF (%) |
|----------|---------|------------------------------|---------|--------|
| BODIPY 1 | 0.08    | 0.78                         | 0.21    | 51     |
| BODIPY 1 | 0.08    | 0.46                         | 0.28    | 62     |
| BODIPY 2 | 0.4     | 2.53                         | 0.29    | 53     |
| BODIPY 2 | 0.3     | 1.28                         | 0.30    | 57     |

**Table S2.** Photovoltaic performances of realized devices for BODIPY 1 and BPDIPY 2. In water and Q/H<sub>2</sub>Q as mediator.

|          | PCE (%) | Jsc<br>(mA/cm <sup>2</sup> ) | Voc (V) | FF (%) |
|----------|---------|------------------------------|---------|--------|
| BODIPY 1 | 0.0004  | 0.0237                       | 0.057   | 28.4   |
| BODIPY 1 | 0.0001  | 0.018                        | 0.014   | 34     |
| BODIPY 2 | 0.00101 | 0.0194                       | 0.128   | 38.5   |
| BODIPY 2 | 0.00102 | 0.0195                       | 0.128   | 38.8   |
